# Supplementary material
Source: MDPI journal article supplement (https://www.mdpi.com/2073-4344/13/2/318)
Supplement: s1 [file s1]

# Synthesis of 2-Methylpyrazine Using Crude Glycerol over Zn-Cr-O Catalyst: A Value Addition Process for the Utilization of Biodiesel By-Product

Reema Sarkari <sup>1</sup>, Kotesb Kumar Mandari <sup>1</sup>, Sudhakar Medak <sup>1</sup>, Kishore Ramineni <sup>1</sup>, Hari Padmasri Aytam <sup>2,\*</sup> and Venugopal Akula <sup>1,\*</sup>

<sup>1</sup> Catalysis and Fine Chemicals Division, CSIR—Indian Institute of Chemical Technology, Tarnaka, Hyderabad 500 007, TS, India

<sup>2</sup> Department of Chemistry, University College of Science, Osmania University, Hyderabad 500 007, TS, India

\* Correspondence: ahpadasri@osmania.ac.in (H.P.A.); akula@iict.res.in (V.A.); Tel.: +91-40-27193165 (V.A.)

## UV-DRS analysis of the ZnCr catalysts with varied mole ratios:

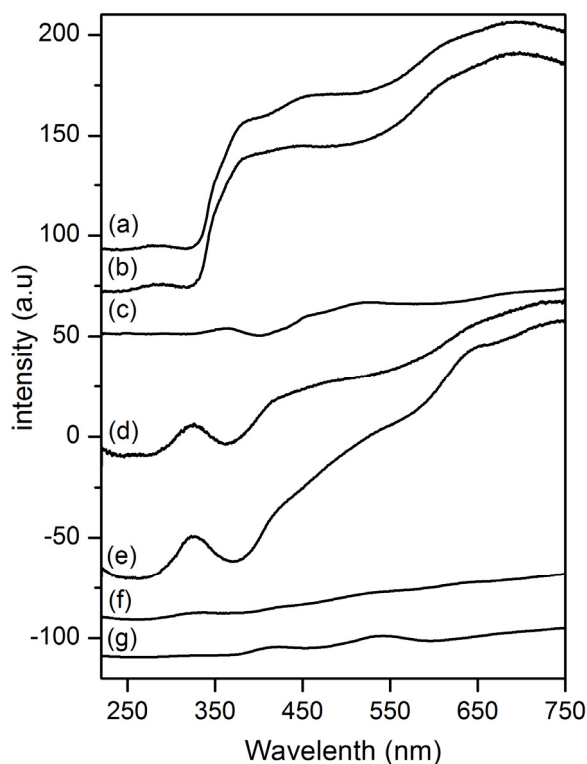

**Figure S1:** UV-DR spectra of (a) Zn<sub>4</sub>Cr<sub>1</sub>, (b) Zn<sub>3</sub>Cr<sub>1</sub>, (c) Zn<sub>2</sub>Cr<sub>1</sub>, (d) Zn<sub>1</sub>Cr<sub>1</sub>, (e) Zn<sub>1</sub>Cr<sub>2</sub>, (f) Zn<sub>1</sub>Cr<sub>3</sub> and (g) Zn<sub>1</sub>Cr<sub>4</sub> samples.

## TG-DTA analysis of the ZnCr oven dried samples:

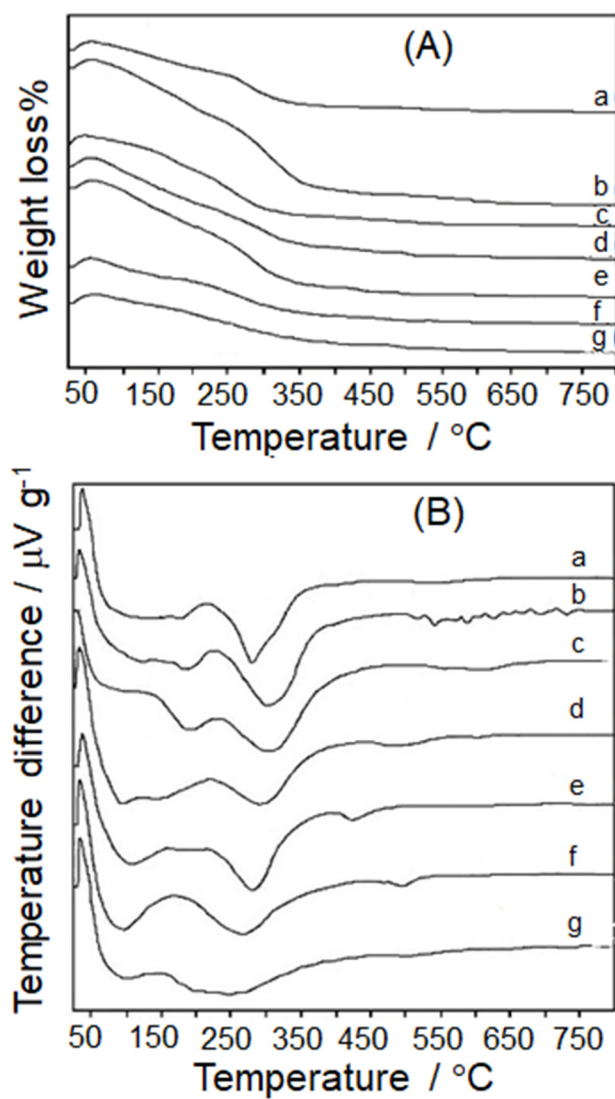

**Figure S2:** (A) TGA and (B) DTA patterns of Zn/Cr with varied mole ratio (a) Zn<sub>4</sub>Cr<sub>1</sub>, (b) Zn<sub>3</sub>Cr<sub>1</sub>, (c) Zn<sub>2</sub>Cr<sub>1</sub>, (d) Zn<sub>1</sub>Cr<sub>1</sub>, (e) Zn<sub>1</sub>Cr<sub>2</sub>, (f) Zn<sub>1</sub>Cr<sub>3</sub> and (g) Zn<sub>1</sub>Cr<sub>4</sub> samples.
